# Supplementary material for: Loss of macroH2A1 decreases mitochondrial metabolism and reduces the aggressiveness of uveal melanoma cells
Source: publisher site journal article supplement (doi:10.18632/aging.103241), 2020-05-12
Supplement: Supplementary file [file aging-v12i10-103241-supplementary-material-SD1.pdf]

## SUPPLEMENTARY FIGURES

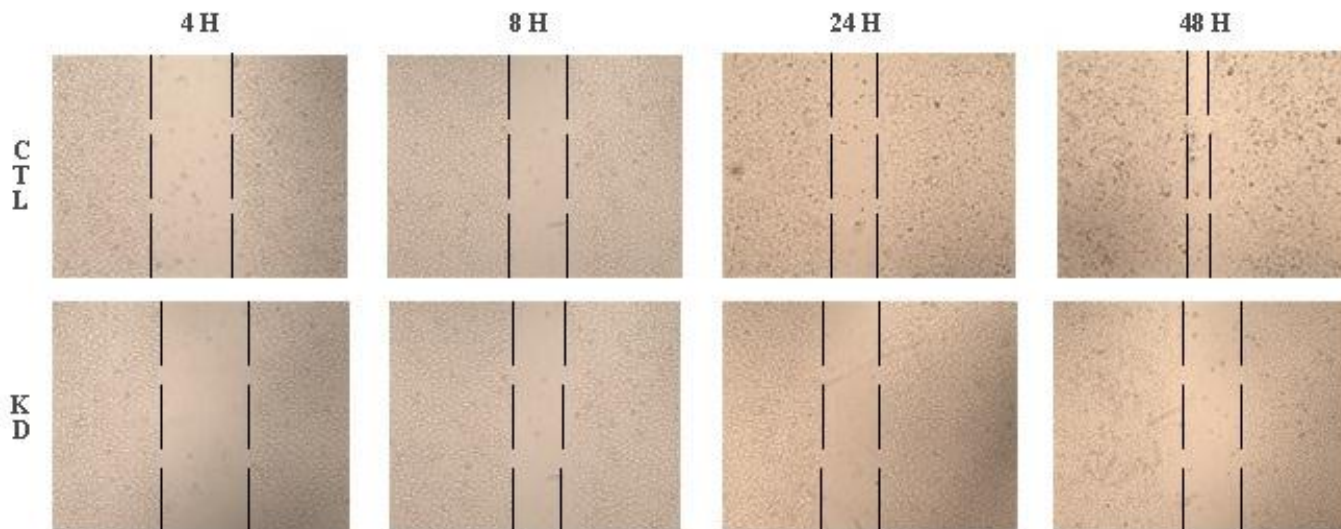

**Supplementary Figure 1. Proliferation of 92.1 UM cells control (CTL) or knock-down (KD) for macroH2A1, in presence of serum.** The number of the cells in the area of wound was measured for all the fields and time points (4h, 8h, 24h, 48h) using Image J.

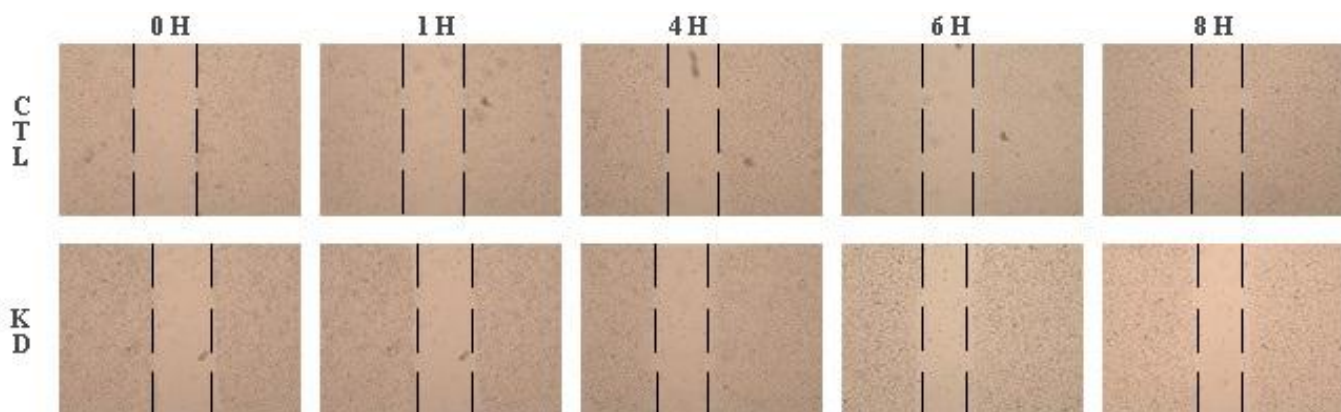

**Supplementary Figure 2. Migration of 92.1 UM cells control (CTL) or knock-down (KD) for macroH2A1, with serum starvation.** The number of the cells in the area of wound was measured for all the fields and time points (0h, 1h, 4h, 6h, 8h) using Image J.
